# Supplementary material for: Electrochemical immunosensor modified with carbon nanofibers coupled to a paper platform for the determination of gliadins in food samples
Source: Royal Society of Chemistry journal article supplement (doi:10.1039/c9ay00255c), 2019-01-01
Supplement: c9ay00255c1.pdf [file c9ay00255c1.pdf]

***Electrochemical immunosensor modified with carbon nanofibers  
coupled to a paper platform for the determination of gliadins in food  
samples.***

*ANALYTICAL METHODS*

*Evelyn Marín -Barroso, Germán A. Messina, Franco A. Bertolino, Julio Raba, Sirley V.*

*Pereira \**

INQUISAL, Departamento de Química, Facultad de Química, Bioquímica y Farmacia, Universidad  
Nacional de San Luis, Chacabuco 917, San Luis, Argentina.

Author to whom correspondence should be addressed: (e-mail) [spereira@unsl.edu.ar](mailto:spereira@unsl.edu.ar).

**A. Table 1** Summary of optimum conditions for gliadin determination

| <i>Sequence</i>        | <i>Conditions</i>                                                                      | <i>Time (min)</i> |
|------------------------|----------------------------------------------------------------------------------------|-------------------|
| Blocking procedure     | 1% of bovine serum albumin (BSA) in 0.01 M<br>PBS pH 7.2                               | 5                 |
| Washing step           | PBS, pH 7.2                                                                            | 2                 |
| Samples                | Sample                                                                                 | 10                |
| Washing buffer         | PBS, pH 7.2                                                                            | 2                 |
| Enzymatic conjugated   | HRP-conjugated (dilution of 1/1000)                                                    | 5                 |
| Washing buffer         | PBS, pH 7.2                                                                            | 2                 |
| Substrate              | 1 mM Q in 1 mM citrate-phosphate buffer pH<br>5 and 1 mM H <sub>2</sub> O <sub>2</sub> | 1                 |
| Amperometric detection | Applied potential: -0.15 V                                                             | 1                 |
| Assay time             |                                                                                        | 28                |

**B. Figure 1.** A figure shows a comparison of CVs obtained in a solution of 1 mM Q in 1 mM citrate-phosphate buffer pH 5 at 0.075 V s<sup>-1</sup> for CNFs/SPCE without paper platform (red line) and CNFs/SPCE with paper platform (black line).

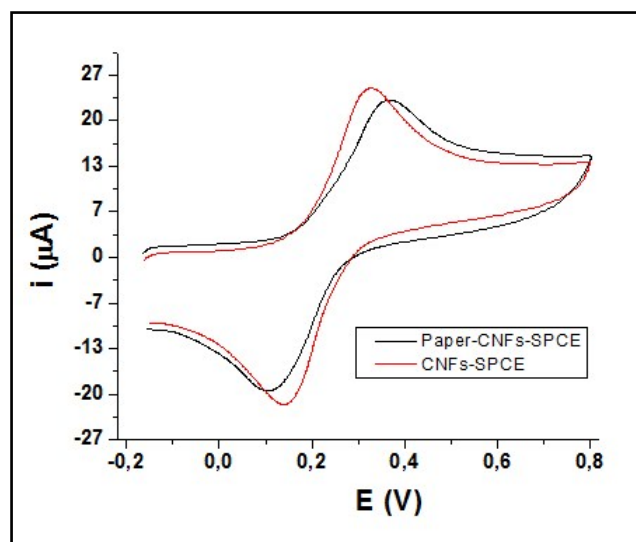

**C. Figure 2.** Parameters optimization: (a) concentration of immobilized anti-gliadin antibodies. (b) Current intensity as a function of reaction time for 20, 40 and 80 μg kg<sup>-1</sup> of gliadin standard concentrations.

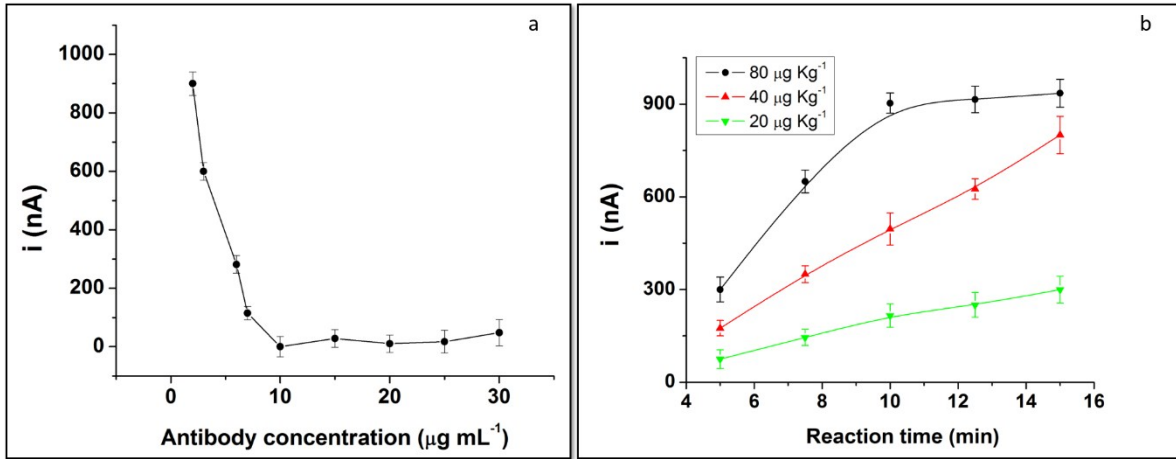

**D. Dilution test for determination of accuracy.**

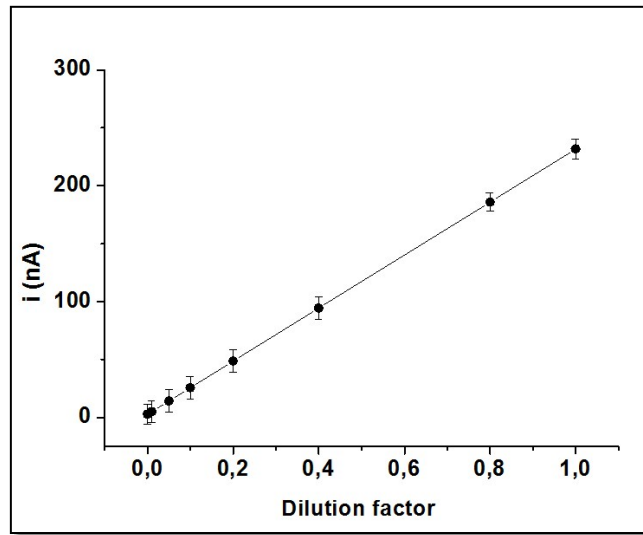

**E. Correlation graph between the ELISA R5 method and the developed immunosensor.**

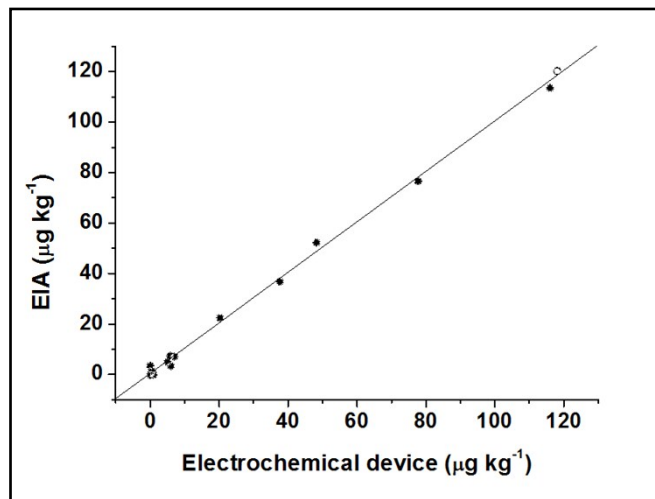

**F. Table 2.** Comparison of the electrochemical immunosensor with the commercial ELISA kit for gliadin determination in food samples.

| <i>Samples<br/>N<sup>o</sup>.</i> | <i>Electrochemical<br/>Immunosensor<sup>a</sup><br/>(mg kg<sup>-1</sup>)</i> | <i>ELISA<br/>Kit<sup>a</sup><br/>(mg kg<sup>-1</sup>)</i> |
|-----------------------------------|------------------------------------------------------------------------------|-----------------------------------------------------------|
| Manioc flour (2)                  | Nd                                                                           | Nd                                                        |
| Rice flour (2)                    | Nd                                                                           | Nd                                                        |
| Gluten free flour<br>(3)          | 3.01                                                                         | 4.13                                                      |
| Common wheat<br>flour (3)         | 59,06                                                                        | 57.43                                                     |

<sup>a</sup> The data is given as average value±SD obtained from five independent experiments (n = 6).

**G. Table 3.** Within-assay precision (five measurements in the same run for each gliadin standard solution) and between-assay precision (five measurements for each gliadin standard, repeated for three consecutive days).

| <i>Standard<sup>a</sup></i> | <i>Within-assay</i>     |            | <i>Between-assay</i>    |            |
|-----------------------------|-------------------------|------------|-------------------------|------------|
|                             | <i>Mean<sup>a</sup></i> | <i>CV%</i> | <i>Mean<sup>a</sup></i> | <i>CV%</i> |
| 5 µg kg <sup>-1</sup>       | 5.62                    | 3.87       | 5.98                    | 5.80       |
| 20 µg kg <sup>-1</sup>      | 19.42                   | 5.13       | 19.23                   | 5.23       |
| 80 µg kg <sup>-1</sup>      | 80.32                   | 4.11       | 82.12                   | 6.56       |

<sup>a</sup> Gliadin concentration (µg kg<sup>-1</sup>)
